# Supplementary material
Source: MDPI journal article supplement (https://www.mdpi.com/search?q=molecules-23-02323)

# SUPPORTING INFORMATION

## Synthesis and Antiproliferative Activity of New Cyclodiprenyl Phenols against Select Cancer Cell Lines

Bastián Said <sup>1</sup>, Iván Montenegro <sup>2</sup>, Manuel Valenzuela <sup>3</sup>, Yusser Olguín <sup>4</sup>, Nelson Caro <sup>5</sup>, Enrique Werner <sup>6</sup>, Patricio Godoy <sup>7</sup>, Joan Villena <sup>8,\*</sup> and Alejandro Madrid <sup>9,\*</sup>

<sup>1</sup> Departamento de Química, Universidad Técnica Federico Santa María, Av. Santa María 6400, Vitacura 7630000, Santiago, Chile; bastian.said@usm.cl

<sup>2</sup> Escuela de Obstetricia y Puericultura, Facultad de medicina, Campus de la Salud, Universidad de Valparaíso, Angamos 655, Reñaca, Viña del Mar 2520000, Chile; E-Mail: ivan.montenegro@uv.cl

<sup>3</sup> Laboratorio de Microbiología Celular, Instituto de Investigación e Innovación en Salud, Facultad de Ciencias de la Salud, Universidad Central de Chile, Santiago 8320000, Chile; E-Mail: manuel.valenzuela@uccentral.cl

<sup>4</sup> Center for Integrative Medicine and Innovative Science (CIMIS), Facultad de Medicina, Universidad Andrés Bello, Santiago 8320000, Chile; yusser.olguin@unab.cl

<sup>5</sup> Centro de Investigación Australbiotech, Universidad Santo Tomás, Avda. Ejército 146, Santiago 8320000, Chile; ncaro@australbiotech.cl

<sup>6</sup> Departamento De Ciencias Básicas, Campus Fernando May Universidad del Biobío. Avda. Andrés Bello s/n casilla 447, Chillán 3780000, Chile; ewerner@ubiobio.cl

<sup>7</sup> Instituto de Microbiología Clínica, Facultad de Medicina, Universidad Austral de Chile, Los Laureles s/n, Isla Teja, Valdivia 5090000, Chile; patricio.godoy@uach.cl

<sup>8</sup> Centro de Investigaciones Biomedicas (CIB), Facultad de Medicina, Campus de la Salud, Universidad de Valparaíso, Angamos 655, Reñaca, Viña del Mar 2520000, Chile; E-Mail: juan.villena@uv.cl

<sup>9</sup> Laboratorio de Productos Naturales y Síntesis Orgánica, Departamento de Química, Facultad de Ciencias Naturales y Exactas, Universidad de Playa Ancha, Avda. Leopoldo Carvallo 270, Playa Ancha, Valparaíso 2340000, Chile; E-Mail: alejandro.madrid@upla.cl

\* Correspondence: alejandro.madrid@upla.cl; Tel.: +56-032-250-0526

### Supplementary Material

S.1 Nuclear magnetic resonance spectra

S.2 High-resolution mass spectra

S.3 Infrared spectra

## S.1 Nuclear magnetic resonance spectra

### Compound 2

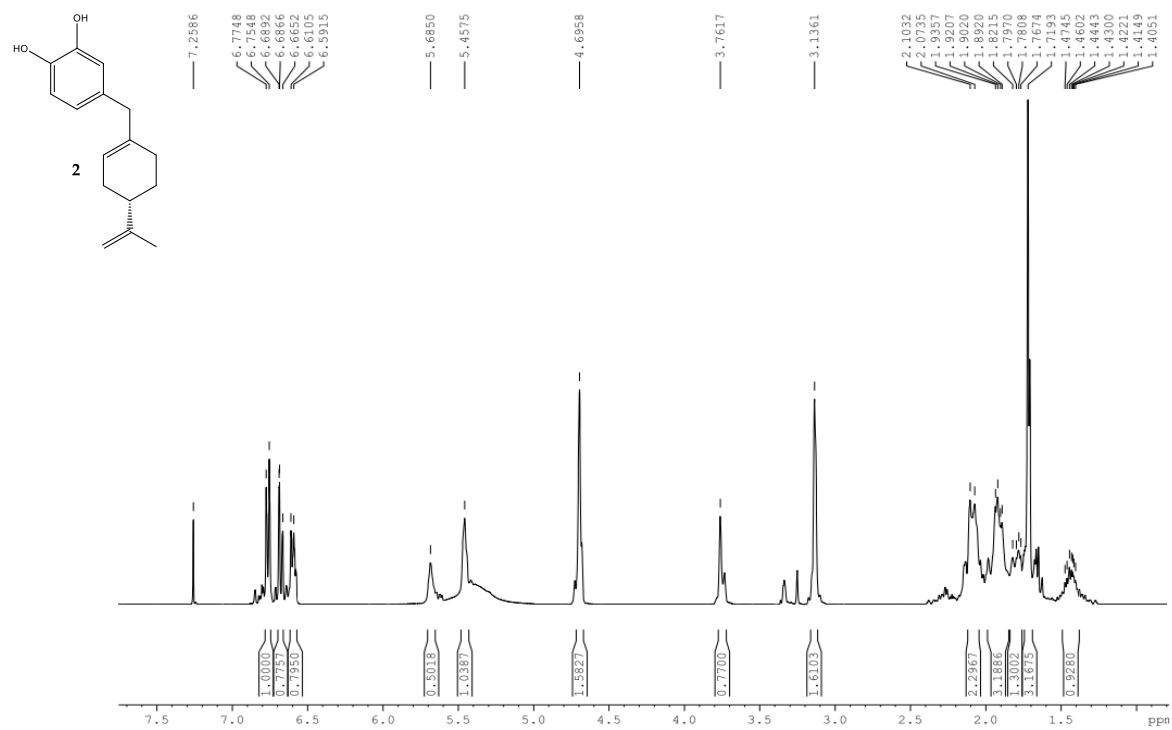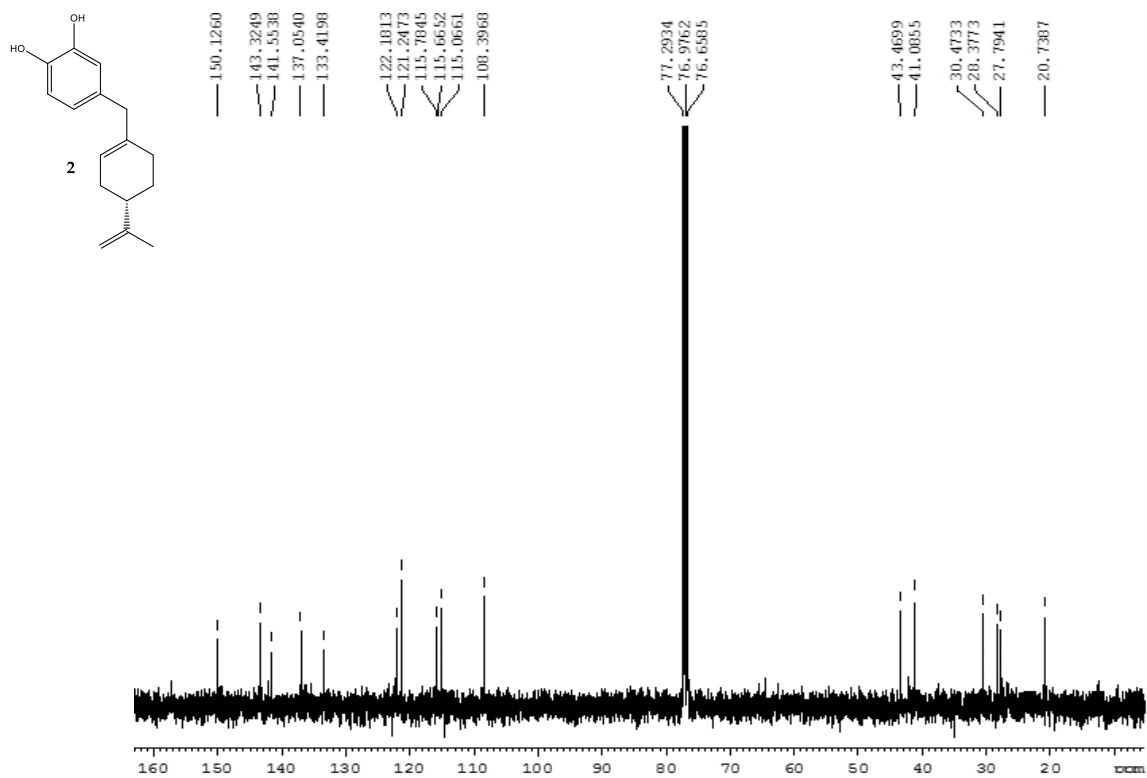

# Compound 3

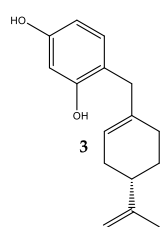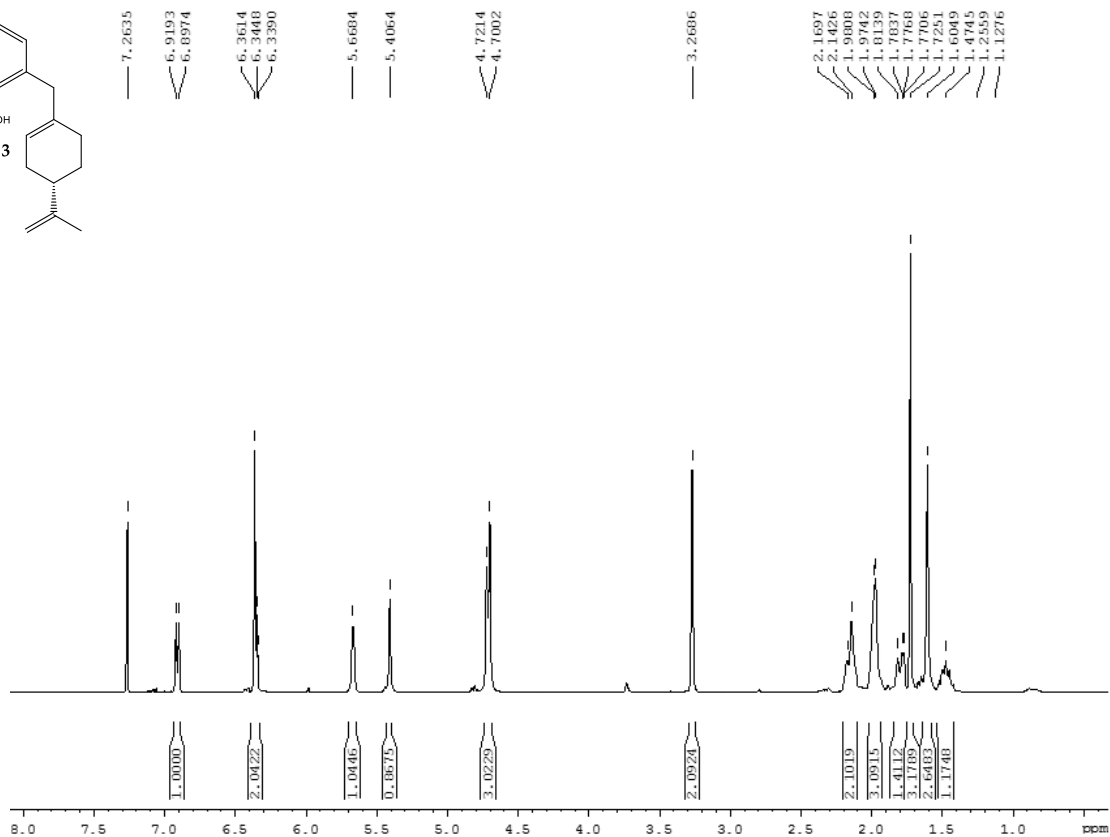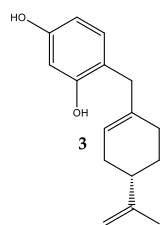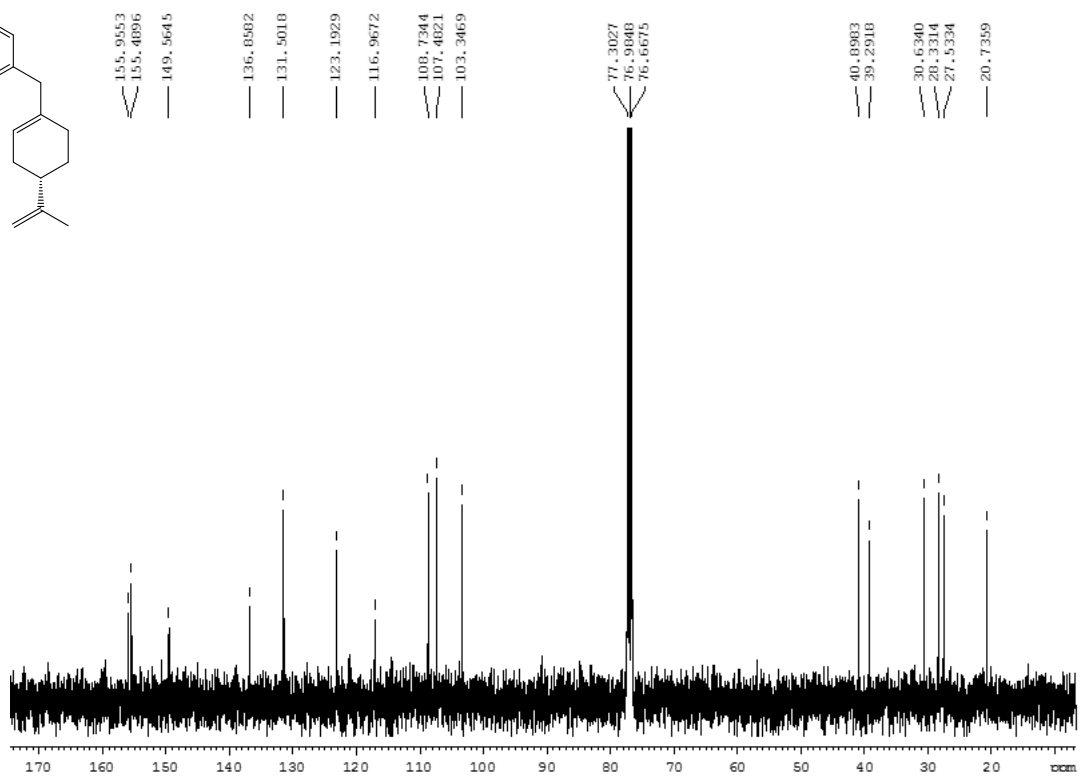

# Compound 4

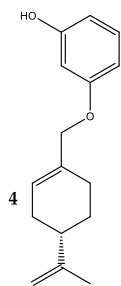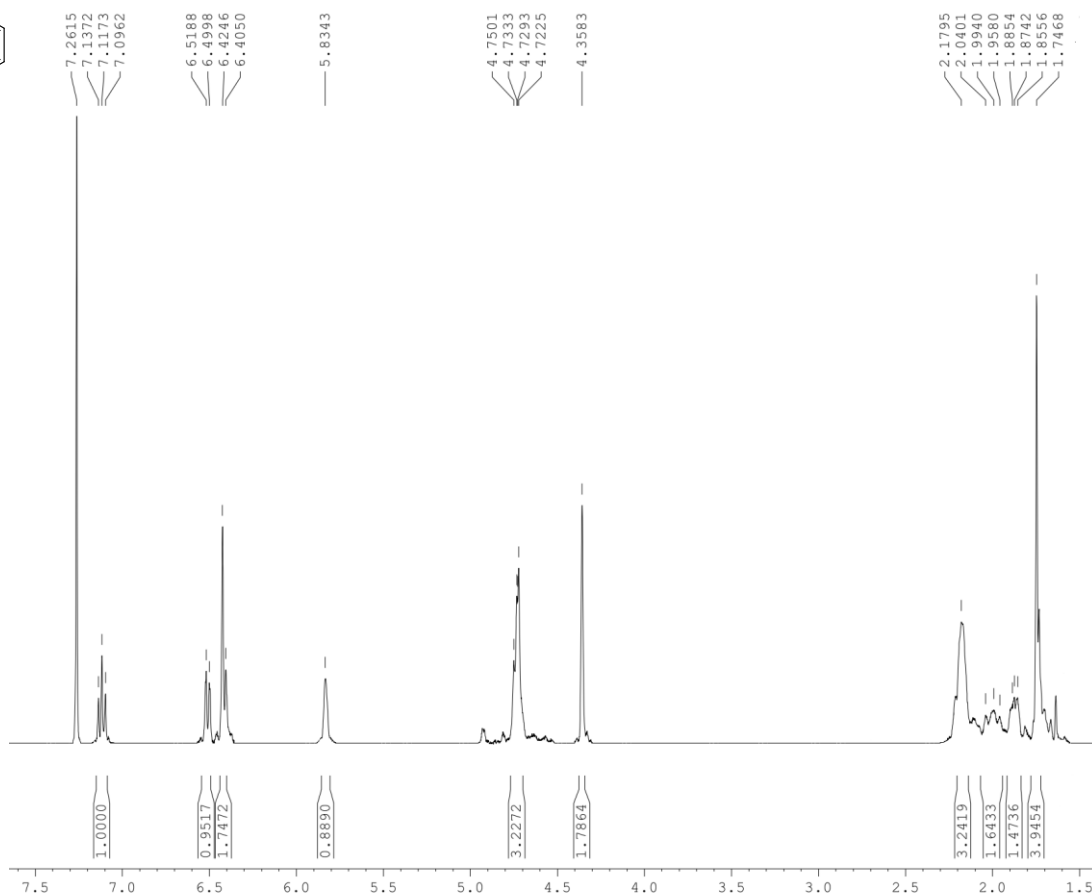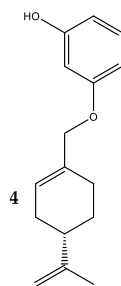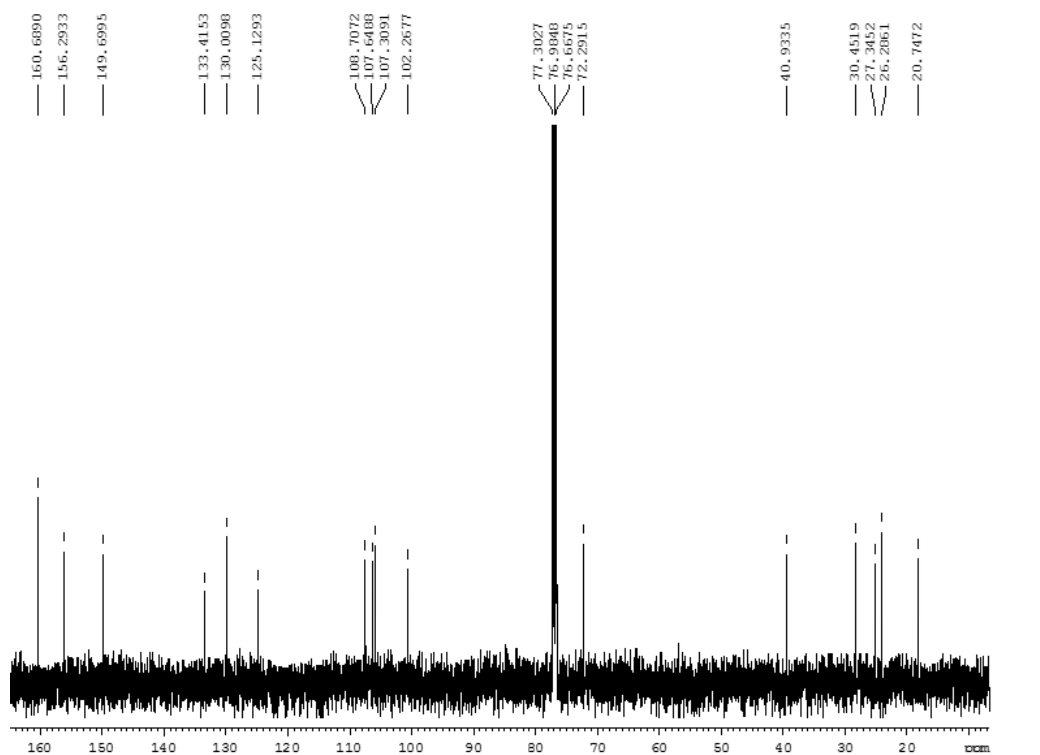

# Compound 5

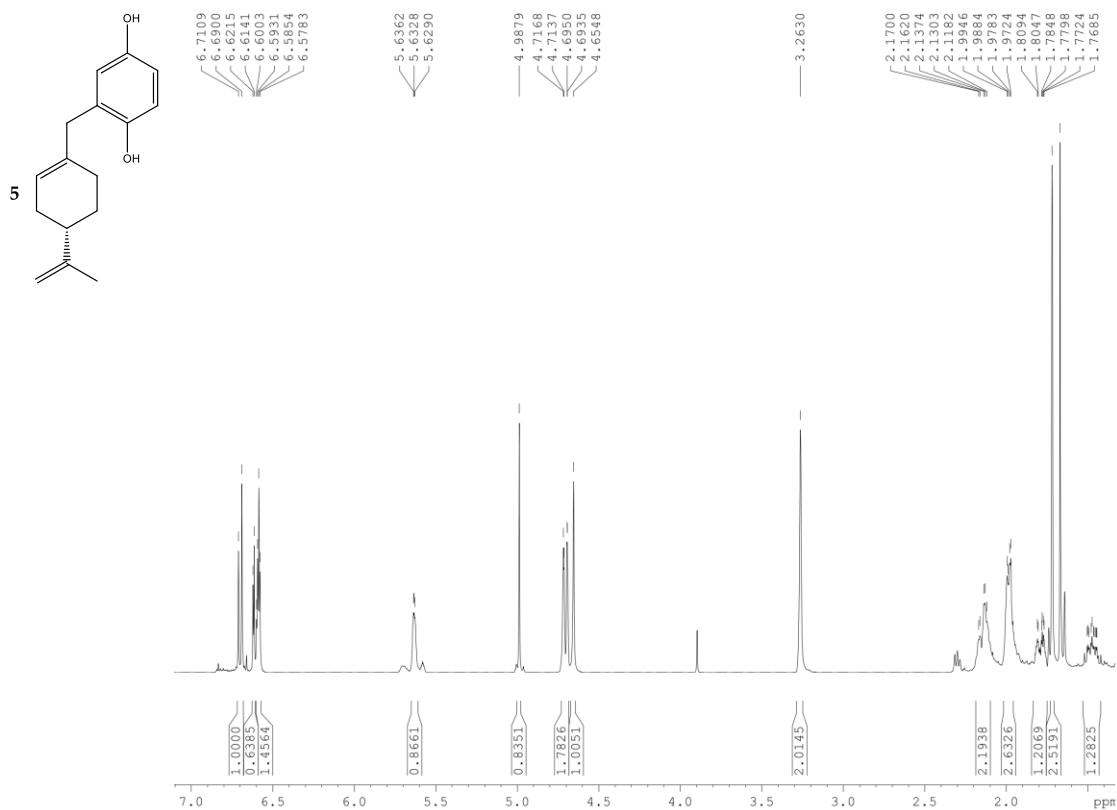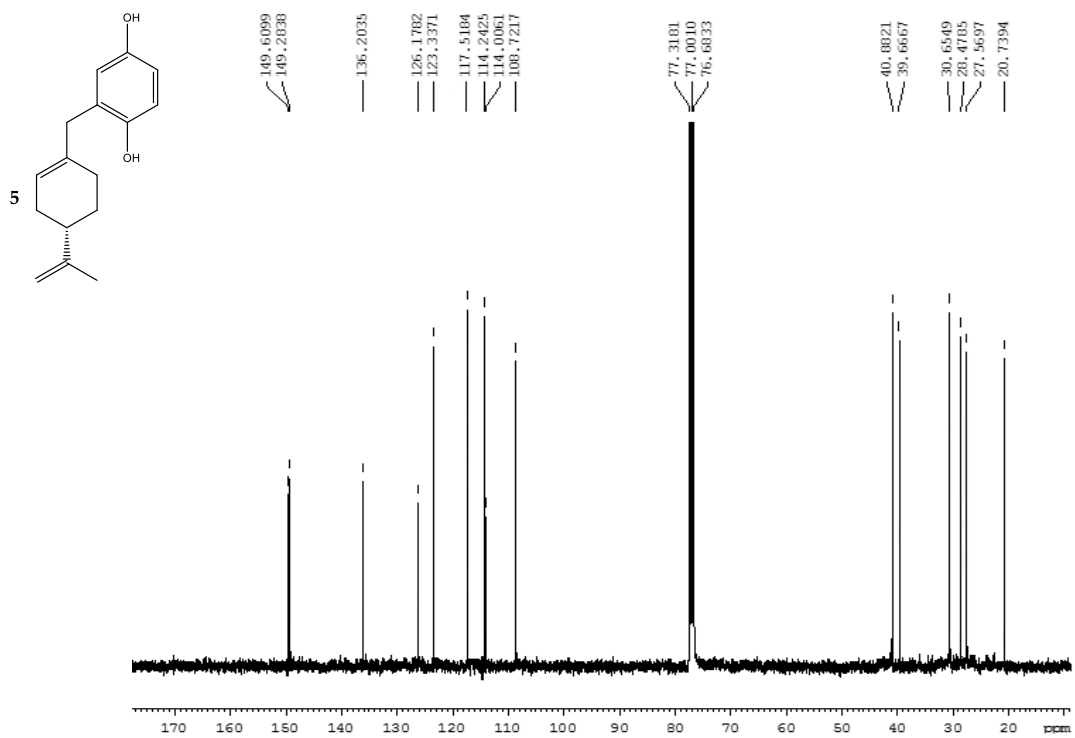

# Compound 6

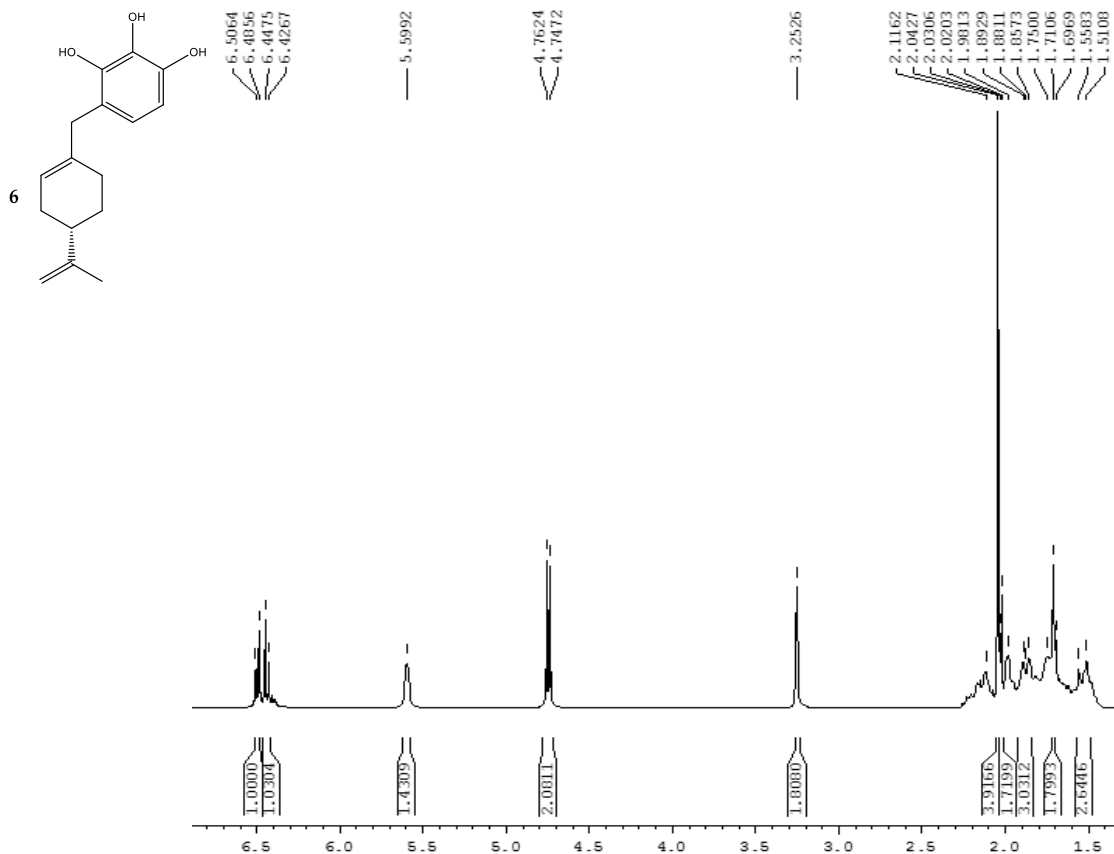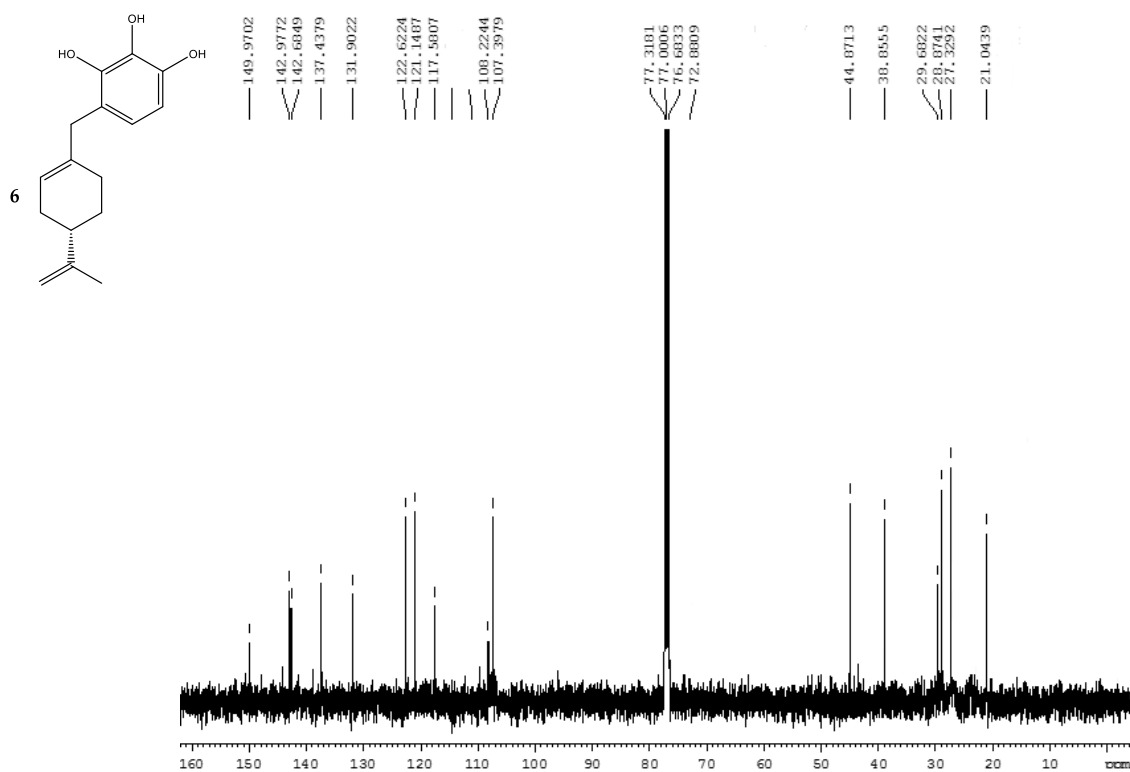

# Compound 7

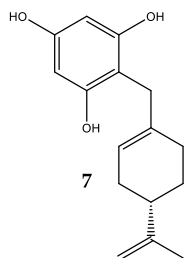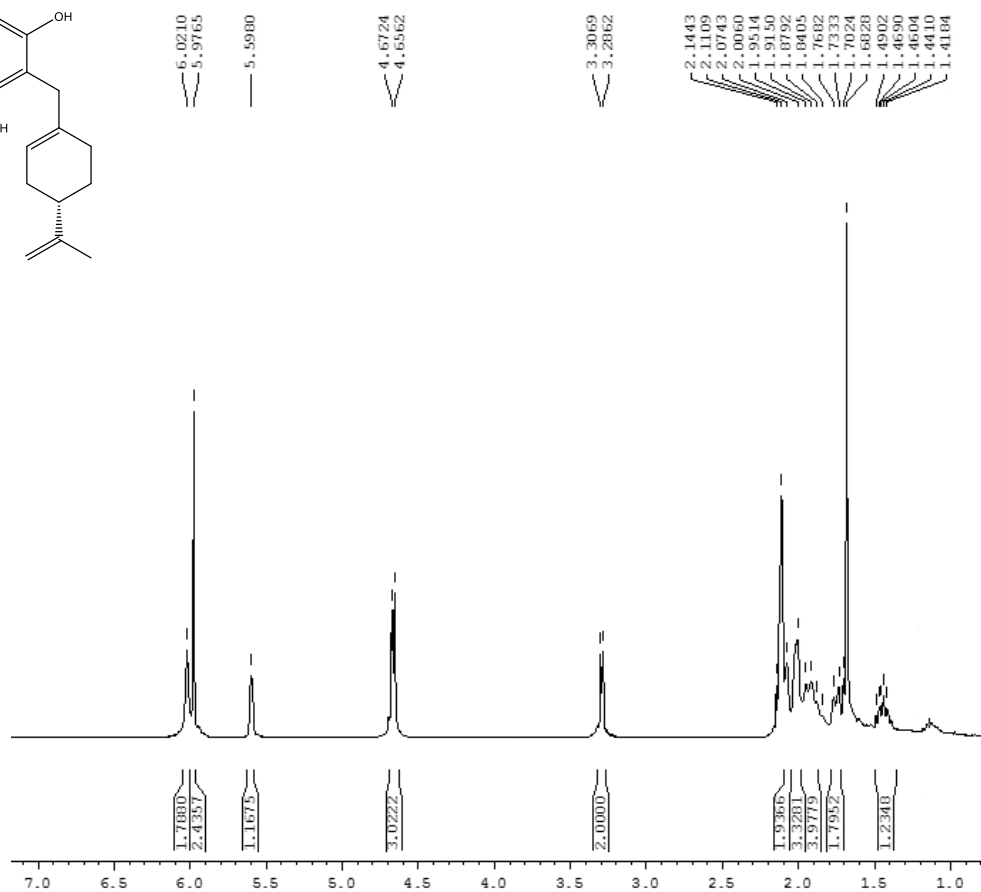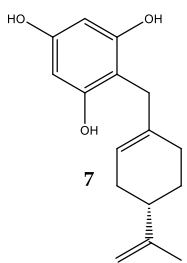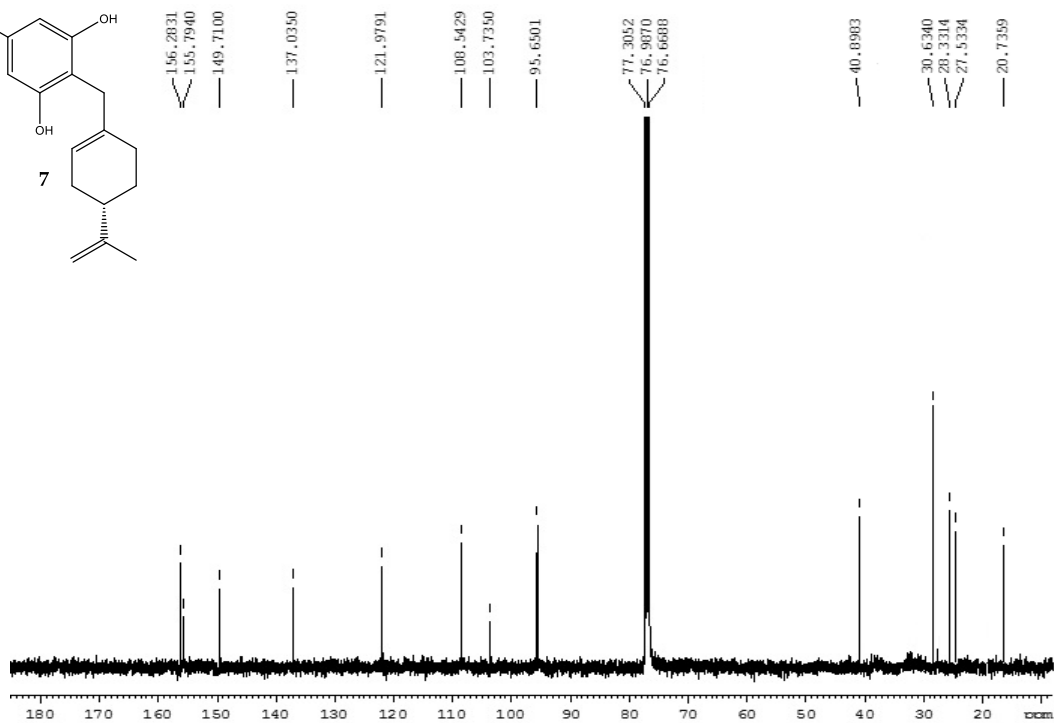

## S.2 High resolution mass spectrometry

### Compound 2

LUISEP-AL-4 286 (5.291) Cm (277:286)

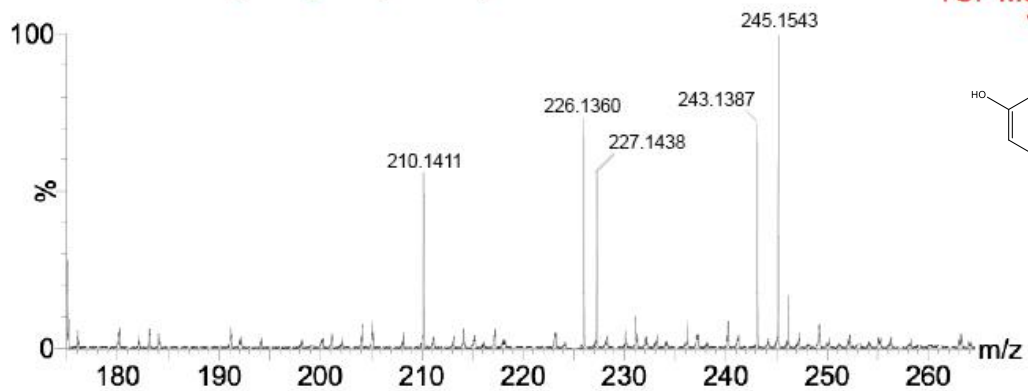

### Compound 3

LUISEP-AL-4 286 (5.291) Cm (277:286)

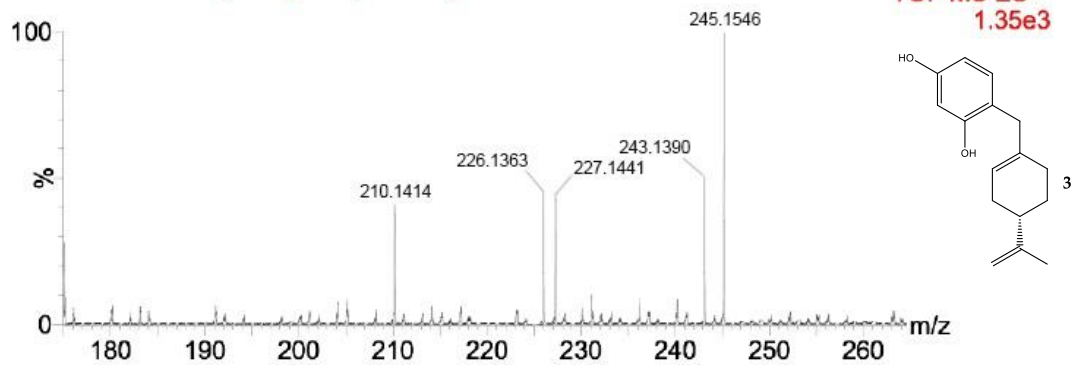



## Compound 4

LUISEP-AL-4 683 (12.634) Cm (681:705)

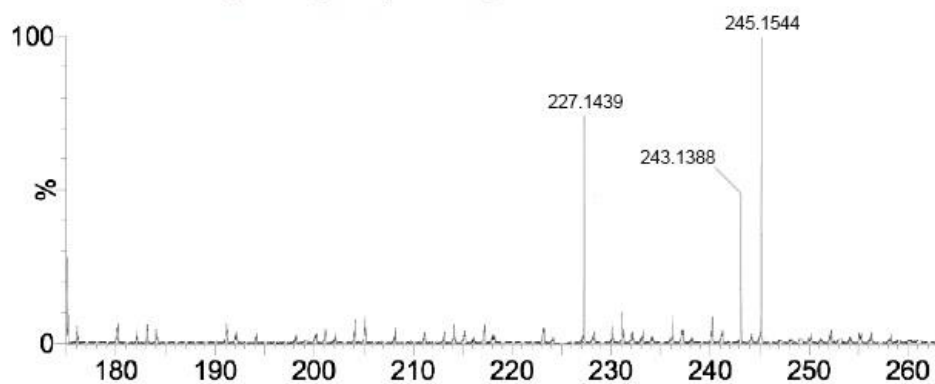

TOF MS ES+  
1.05e3

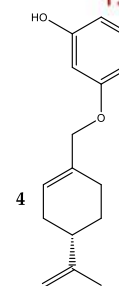

## Compound 5

LUISEP-AL-4 797 (14.743) Cm (796:825)

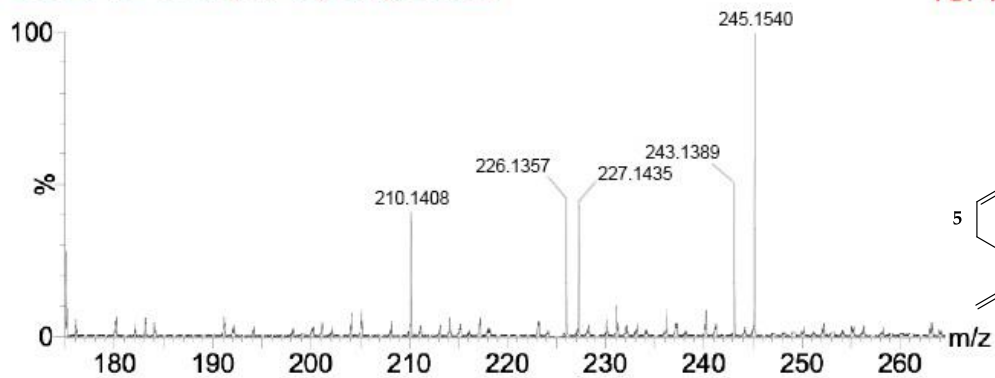

TOF MS ES+  
1.52e3

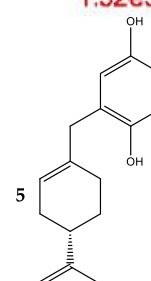

## Compound 6

LUISEP-AL-25 202 (3.737) Cm (202:213)

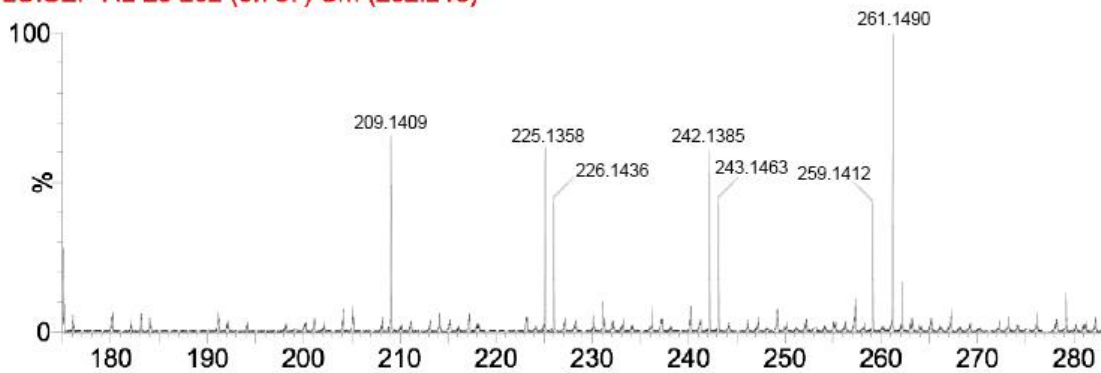

TOF MS ES+  
1.85e3

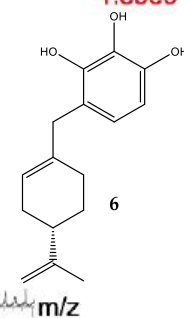

Compound 7

LUISEP-AL-25 202 (3.737) Cm (202:213)

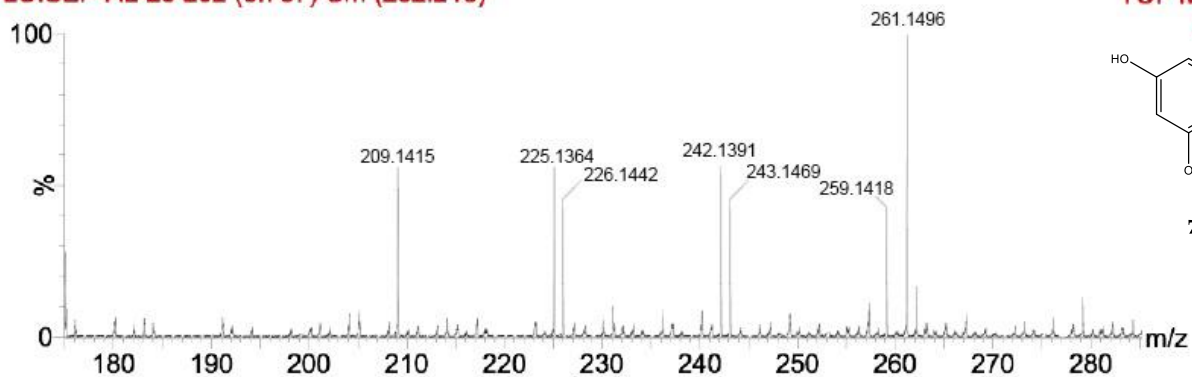

TOF MS ES+  
2.02e3

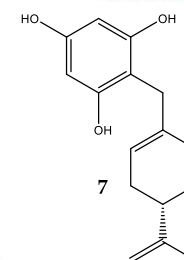

### S.3 Infrared spectra

#### Compound 2

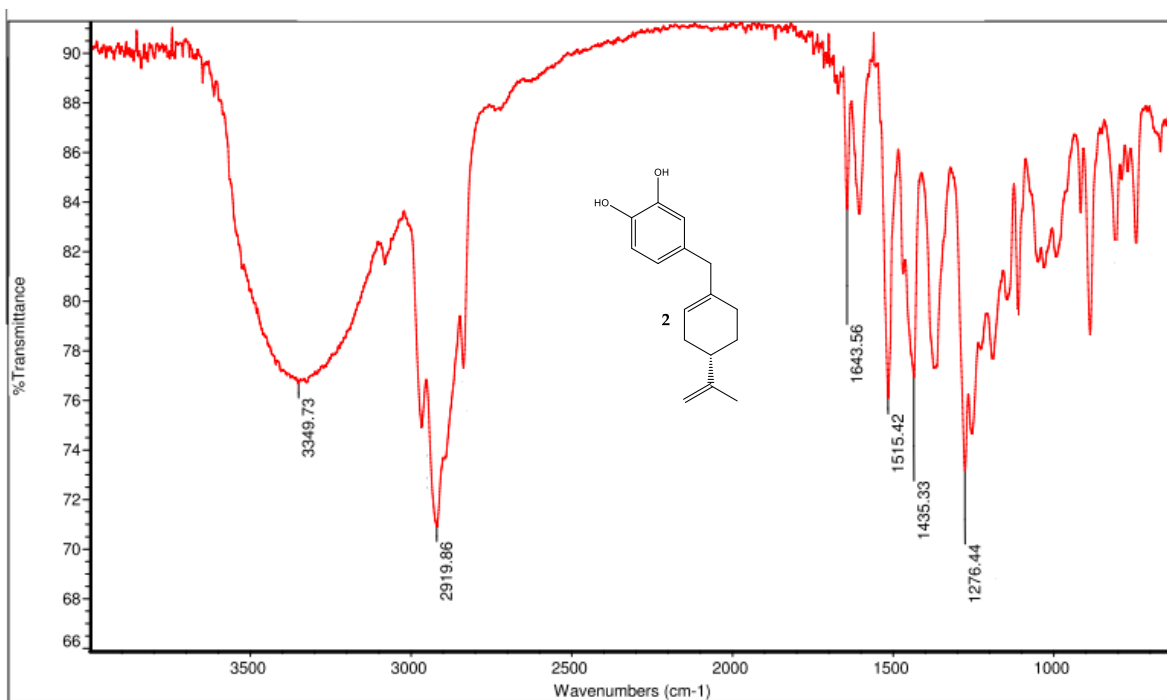

# Compound 3

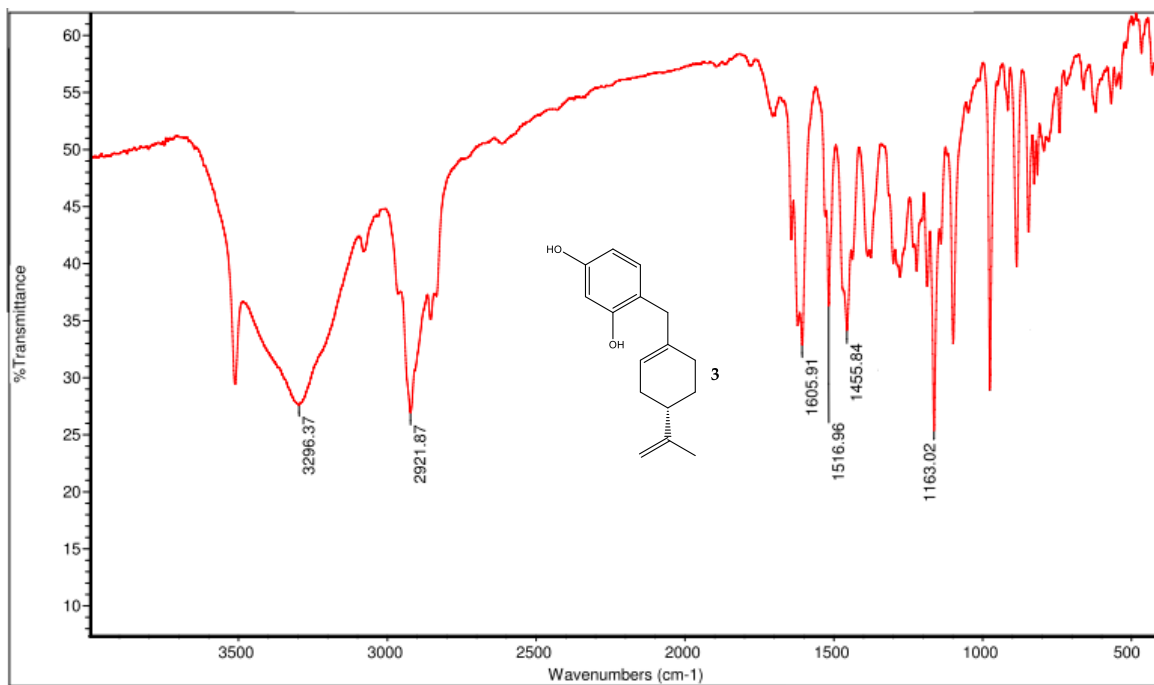

# Compound 4

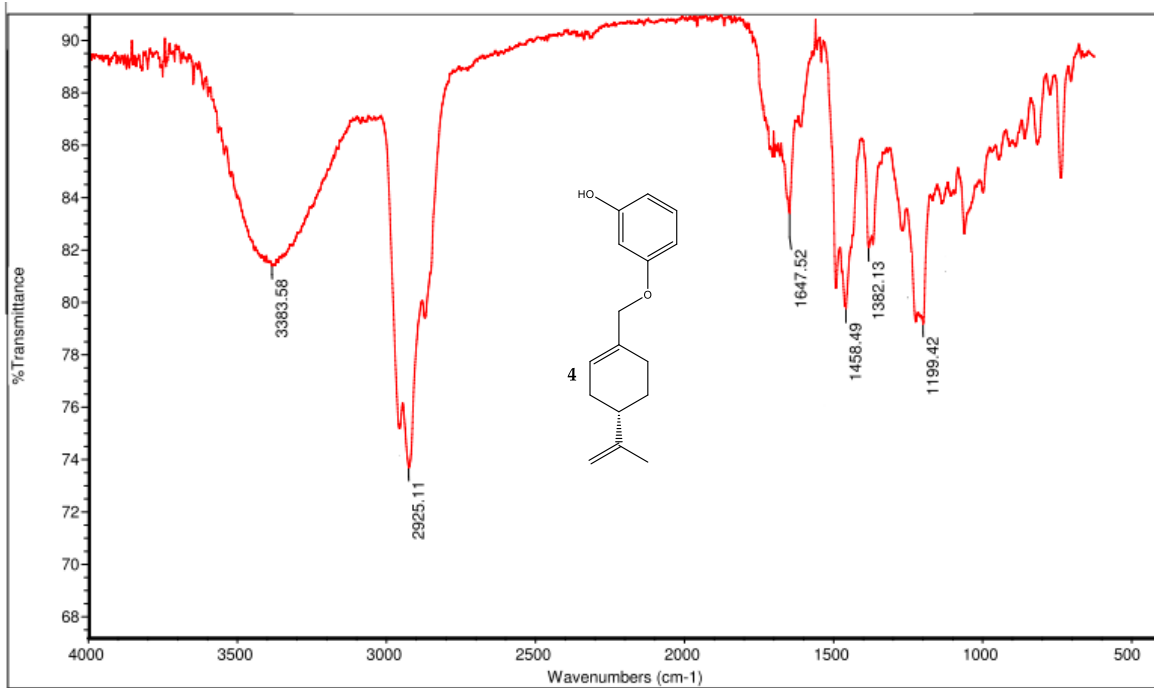

# Compound 5

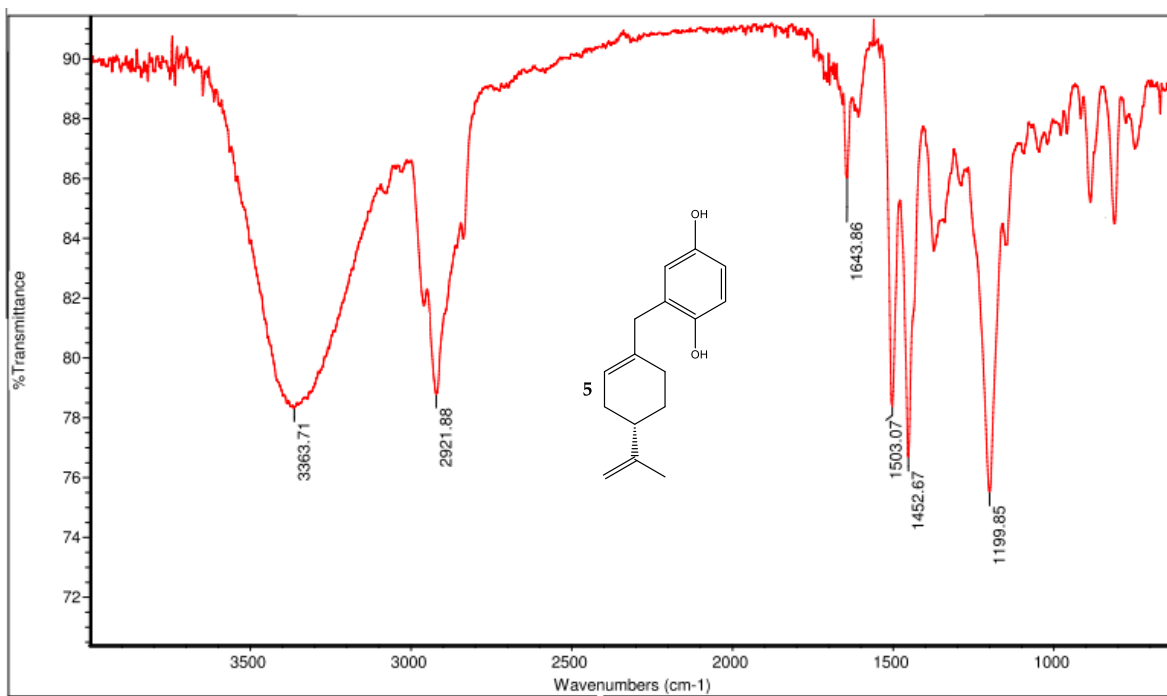

# Compound 6

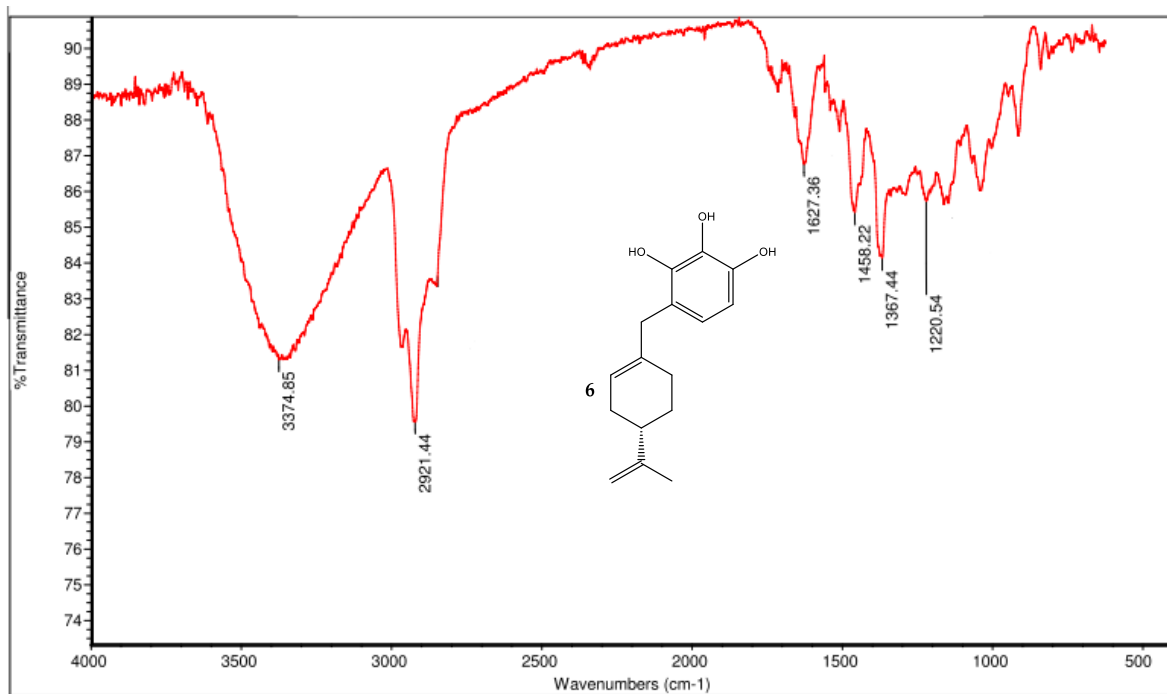

# Compound 7

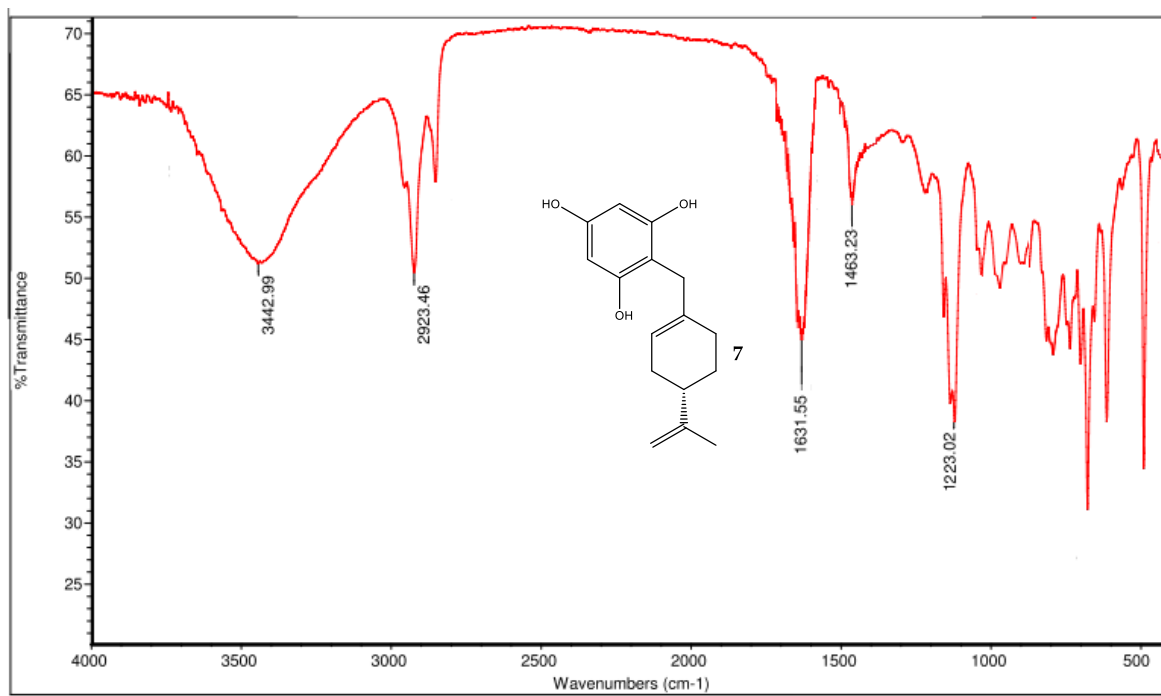

Supplement: s001 [file molecules-23-02323-s001.pdf]
